# Supplementary material
Source: PubMed Central journal article supplement (PMC3989804)
Supplement: supp_113.211276_jpet211276_fig_1.pdf [file supp_113.211276_jpet211276_fig_1.pdf]

Trovafloxacin Potentiation of Lipopolysaccharide-Induced Tumor Necrosis Factor Release from RAW 264.7 cells requires ERK and JNK.

Kyle L. Poulsen, Ryan P. Albee, Patricia E. Ganey and Robert A. Roth

Journal of Pharmacology and Experimental Therapeutics

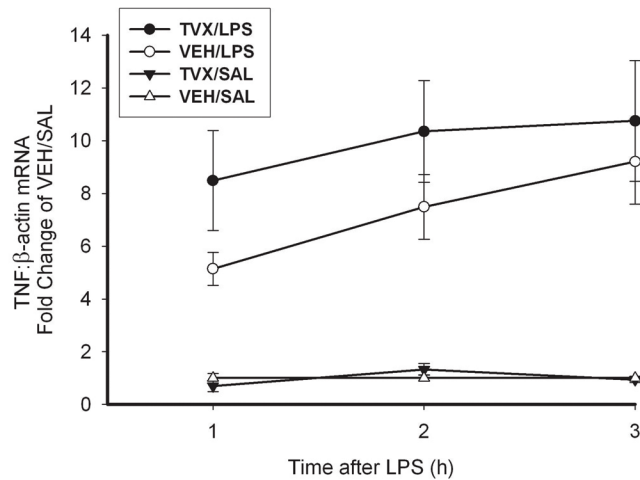

**Supplemental Figure 1. Effect of TVX treatment on TNF mRNA expression in RAW cells after LPS exposure.** RNA was isolated from RAW cells after SAL- or LPS-exposure at the indicated times. The RNA was converted to cDNA, and TNF mRNA was quantified by RT-PCR and normalized to  $\beta$ -actin mRNA. Values are means of fold change of VEH/SAL  $\pm$  SEM, n=6. No significant differences were observed due to TVX pretreatment.
