# Supplementary material
Source: PubMed Central journal article supplement (PMC3989804)
Supplement: supp_113.211276_jpet211276_fig_2.pdf [file supp_113.211276_jpet211276_fig_2.pdf]

Trovafoxacin Potentiation of Lipopolysaccharide-Induced Tumor Necrosis Factor Release from RAW 264.7 cells requires ERK and JNK.

Kyle L. Poulsen, Ryan P. Albee, Patricia E. Ganey and Robert A. Roth

Journal of Pharmacology and Experimental Therapeutics

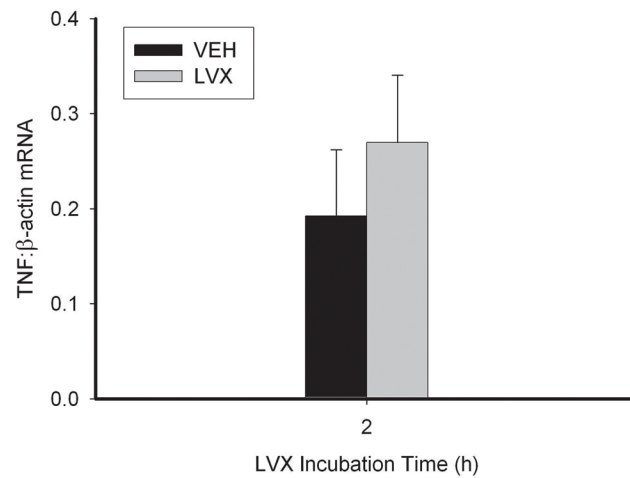

**Supplemental Figure 2. Lack of effect of LVX treatment on TNF mRNA expression in RAW cells.** RNA was isolated from RAW cells after VEH or LVX (300  $\mu$ M) exposure for 2h, converted to cDNA, and TNF mRNA was quantified by RT-PCR and normalized to  $\beta$ -actin mRNA. Values are means  $\pm$  SEM, n=3. No significant difference was observed.
