# Supplementary material
Source: PubMed Central journal article supplement (PMC3989804)
Supplement: supp_113.211276_jpet211276_fig_3.pdf [file supp_113.211276_jpet211276_fig_3.pdf]

Trovafloxacin Potentiation of Lipopolysaccharide-Induced Tumor Necrosis Factor Release from RAW 264.7 cells requires ERK and JNK.

Kyle L. Poulsen, Ryan P. Albee, Patricia E. Ganey and Robert A. Roth

Journal of Pharmacology and Experimental Therapeutics

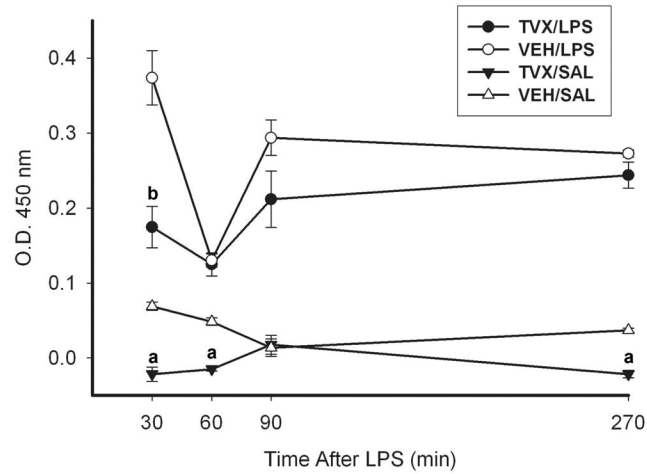

**Supplemental Figure 3. NF- $\kappa$ B binding analysis in TVX/LPS-coexposed RAW**

**cells.** Protein extracts were prepared from TVX-pretreated RAW cells at the indicated time following LPS exposure, and p65 subunit binding to the consensus NF- $\kappa$ B response element was assessed by ELISA. Values are mean O.D. @ 450 nm  $\pm$  SEM, n=3. a - p < 0.05 vs. VEH/SAL within a timepoint, b - p < 0.05 vs. VEH/LPS within a timepoint
